# Supplementary material for: A systematic review of behavioural and exercise interventions for the prevention and management of chemotherapy-induced peripheral neuropathy symptoms
Source: PubMed Central journal article supplement (PMC9971149; doi:10.1007/s11764-021-00997-w), 2021-03-12
Supplement: 11764_2021_997_MOESM1_ESM.pdf [file 11764_2021_997_MOESM1_ESM.pdf]

# **A systematic review of behavioural and exercise interventions for the prevention and management of chemotherapy-induced peripheral neuropathy symptoms**

Journal of Cancer Survivorship

Tanay MAL, Armes J, Moss-Morris R, Rafferty AM and Robert G

Corresponding author: Tanay MAL [mary.tanay@kcl.ac.uk](mailto:mary.tanay@kcl.ac.uk)

## Online material

Table S-1. Exemplar of the search protocol for Medline.

1. chemotherapy.mp.
2. peripheral neuropathy.mp.
3. neuropathy.mp.
4. 2 or 3
5. 1 and 4
6. intervention.mp.
7. program\$.mp. or exp \*Programs/
8. system.mp.
9. exercise.mp
10. exp \*Physical Activity as Topic
11. follow-up.mp.
12. model.mp.
13. 6 or 7 or 8 or 9 or 10 or 11 or 12
14. psycholog\*.mp.
15. exp Behavior Therapy/ or exp Behavior/ or behavior#r.mp.
16. education\*.mp.
17. exp \*Patient Education as Topic/ or psychoeducation\*.mp.
18. self-management.mp. or exp Self Care/ or exp Self-Management/
19. motivational interview\*.mp. or Motivational Interviewing /
20. 14 or 15 or 16 or 17 or 18 or 19
21. 5 and 13 and 20
22. limit 21 to (english language and yr="2000 -Current" and english and humans and cancer and "humans only (remove records about animals)")

Table S-2. Results of quality assessment of studies using the EPHP a Quality Assessment Tool for Quantitative Studies (Thomas et al. 2004)

| STUDIES INCLUDED                        | CRITERIA       |              |             |                  |                         |                  |          |
|-----------------------------------------|----------------|--------------|-------------|------------------|-------------------------|------------------|----------|
|                                         | Selection bias | Study design | Confounders | Blinding Process | Data collection methods | Sample attrition | Overall  |
| <b>Behavioural intervention studies</b> |                |              |             |                  |                         |                  |          |
| Given et al. (2008)                     | Moderate       | Strong       | Moderate    | Weak             | Moderate                | Moderate         | Moderate |
| Toftagen et al. (2016)                  | Moderate       | Moderate     | Weak        | Moderate         | Strong                  | Moderate         | Moderate |
| Knoerl et al. (2018a)                   | Moderate       | Moderate     | Moderate    | Moderate         | Strong                  | Strong           | Strong   |
| Knoerl et al. (2018b)                   | Strong         | Strong       | Moderate    | Strong           | Strong                  | Moderate         | Strong   |
| Kolb et al. (2018)                      | Moderate       | Strong       | Weak        | Moderate         | Strong                  | Moderate         | Moderate |
| Knoerl et al. (2019)                    | Moderate       | Strong       | Moderate    | Moderate         | Strong                  | Strong           | Strong   |
| <b>Exercise intervention studies</b>    |                |              |             |                  |                         |                  |          |
| Wonders et al. (2013)                   | Moderate       | Moderate     | Moderate    | Moderate         | Weak                    | Weak             | Weak     |
| Streckman et al. (2014)                 | Strong         | Moderate     | Moderate    | Weak             | Moderate                | Weak             | Weak     |
| Toftagen et al. (2014)                  | Weak           | Moderate     | Weak        | Weak             | Moderate                | Weak             | Weak     |
| Fernandes & Kumar (2016)                | Weak           | Moderate     | Weak        | Weak             | Weak                    | Weak             | Weak     |
| Schwenk et al. (2016)                   | Moderate       | Strong       | Moderate    | Moderate         | Strong                  | Moderate         | Moderate |
| Kleckner et al. (2018)                  | Moderate       | Strong       | Strong      | Moderate         | Strong                  | Strong           | Strong   |
| Vollmers et al. (2018)                  | Moderate       | Weak         | Moderate    | Moderate         | Strong                  | Moderate         | Moderate |
| Zimmer et al (2018)                     | Moderate       | Moderate     | Moderate    | Moderate         | Strong                  | Strong           | Moderate |
| McCrary et al. (2019)                   | Moderate       | Moderate     | Moderate    | Moderate         | Strong                  | Strong           | Moderate |
| Kneis et al. (2019)                     | Strong         | Moderate     | Moderate    | Moderate         | Strong                  | Strong           | Moderate |
| Bland et al. (2019)                     | Strong         | Moderate     | Strong      | Weak             | Moderate                | Strong           | Moderate |
| Hammond et al. (2020)                   | Moderate       | Weak         | Weak        | Moderate         | Weak                    | Weak             | Weak     |
| Bahar-Ozdemir et al. (2020)             | Moderate       | Moderate     | Weak        | Moderate         | Moderate                | Moderate         | Moderate |
